# Supplementary material for: Acupuncture Alters Brain's Dynamic Functional Network Connectivity in Stroke Patients with Motor Dysfunction: A Randomised Controlled Neuroimaging Trial
Source: Neural Plast. 2023 Jun 20;2023:8510213. doi: 10.1155/2023/8510213 (PMC10299883; doi:10.1155/2023/8510213)
Supplement: Supplementary Materials — The supplementary materials provide more detailed information. The probability map and detailed information of the lesion location in each patient are shown in Supplementary Material 1. The location of all acupoints is also shown in Supplementary Material 1. The results of validation analysis are shown in Supplementary Material 2. [file 8510213.f1.zip]

Archive with 2 entries (2 files):
- Supplementary material 1.doc
- Supplementary material 2.doc
